# Supplementary material for: Mitochondrial genome-wide analysis of nuclear DNA methylation quantitative trait loci
Source: PubMed Central journal article supplement (PMC9122653; doi:10.1093/hmg/ddab339), 2021-11-19
Supplement: supplementary_tables_ddab339.pdf [file supplementary_tables_ddab339.pdf]

# Mitochondrial genome-wide analysis of nuclear DNA methylation quantitative trait loci

Supplementary tables

Supplementary Table 1. Haplogroup frequencies and the corresponding phenotype characteristics of the populations used in the haplogroup-specific analyses. Values are mean (SD) or n (%) for continuous and categorical variables, respectively.

| Haplogroup                                     | H              | U              | J              | V              | T              | W              | K              | X              | I             |
|------------------------------------------------|----------------|----------------|----------------|----------------|----------------|----------------|----------------|----------------|---------------|
| YFS                                            |                |                |                |                |                |                |                |                |               |
| No. of participants                            | 374<br>(43.3)  | 218<br>(25.3)  | 60<br>(7.0)    | 50<br>(5.8)    | 48<br>(5.6)    | 40<br>(4.6)    | 34<br>(3.9)    | 22<br>(2.5)    | 17<br>(2.0)   |
| Age, years                                     | 42.0<br>(4.9)  | 42.3<br>(5.1)  | 40.8<br>(5.1)  | 41.6<br>(5.7)  | 42.1<br>(5.5)  | 42.0<br>(5.1)  | 41.4<br>(4.3)  | 42.2<br>(5.6)  | 42.6<br>(5.0) |
| Women                                          | 210<br>(56.2)  | 118<br>(54.1)  | 36<br>(60.0)   | 30<br>(60.0)   | 28<br>(58.3)   | 23<br>(57.5)   | 19<br>(55.9)   | 13<br>(59.1)   | 7 (41.2)      |
| Body mass index, kg/m <sup>2</sup>             | 26.7<br>(5.3)  | 26.5<br>(4.8)  | 26.7<br>(5.0)  | 26.9<br>(4.7)  | 25.2<br>(3.7)  | 26.9<br>(5.5)  | 26.8<br>(4.2)  | 28.2<br>(4.6)  | 27.2<br>(4.5) |
| Active smoker                                  | 50<br>(13.4)   | 32<br>(14.7)   | 9 (15.0)       | 4 (8.0)        | 2 (4.2)        | 7 (17.5)       | 7 (20.6)       | 3 (13.6)       | 3 (17.7)      |
| Smokes once a week or more often but not daily | 17 (4.6)       | 6 (2.8)        | 3 (5.0)        | 3 (6.0)        | 3 (6.3)        | 1 (2.5)        | 1 (2.9)        | 0 (0.0)        | 0 (0.0)       |
| Smokes less often than once a week             | 14 (3.7)       | 7 (3.2)        | 1 (1.7)        | 3 (6.0)        | 2 (4.2)        | 1 (2.5)        | 1 (2.9)        | 4 (4.6)        | 1 (5.9)       |
| Attempts to quit smoking                       | 7 (1.9)        | 4 (1.8)        | 0 (0.0)        | 1 (2.0)        | 0 (0.0)        | 0 (0.0)        | 0 (0.0)        | 0 (0.0)        | 0 (0.0)       |
| Has quit smoking                               | 101<br>(27.0)  | 58<br>(26.6)   | 15<br>(25.0)   | 11<br>(22.0)   | 8 (16.7)       | 10<br>(25.0)   | 8 (23.5)       | 4 (18.2)       | 3 (17.7)      |
| Has never smoked                               | 185<br>(49.5)  | 111<br>(50.9)  | 32<br>(53.3)   | 28<br>(56.0)   | 33<br>(68.8)   | 21<br>(52.5)   | 17<br>(50.0)   | 14<br>(63.6)   | 10<br>(58.8)  |
| LURIC                                          |                |                |                |                |                |                |                |                |               |
| No. of participants                            | 337<br>(33.8)  | 52<br>(5.2)    | 165<br>(16.5)  | 22<br>(2.2)    | 200<br>(20.0)  | 33<br>(3.3)    | 136<br>(13.6)  | 18<br>(1.8)    | 25<br>(3.5)   |
| Age, years                                     | 63.1<br>(10.9) | 62.1<br>(10.2) | 61.5<br>(11.1) | 63.6<br>(12.1) | 62.0<br>(11.1) | 61.4<br>(10.1) | 63.6<br>(10.1) | 61.2<br>(11.2) | 62.2<br>(9.1) |
| Women                                          | 103<br>(30.6)  | 18<br>(34.6)   | 48<br>(29.1)   | 3 (13.6)       | 55<br>(27.5)   | 12<br>(36.4)   | 50<br>(36.8)   | 2 (11.1)       | 10<br>(28.6)  |
| Body mass index, kg/m <sup>2</sup>             | 27.8<br>(4.5)  | 27.3<br>(4.7)  | 27.2<br>(3.8)  | 27.3<br>(3.6)  | 27.7<br>(4.7)  | 28.0<br>(4.6)  | 27.7<br>(4.4)  | 26.6<br>(3.2)  | 27.7<br>(3.1) |
| Heavy smokers                                  | 53<br>(15.7)   | 5 (9.6)        | 19<br>(11.5)   | 4 (18.2)       | 31<br>(15.5)   | 8 (24.2)       | 19<br>(14.0)   | 3 (16.7)       | 5 (14.3)      |
| Light smokers                                  | 21 (6.2)       | 5 (9.6)        | 10 (6.1)       | 1 (4.6)        | 15 (7.5)       | 1 (3.0)        | 16<br>(11.8)   | 2 (11.1)       | 4 (11.4)      |
| Former smokers, quit < 10 years ago            | 46<br>(13.7)   | 3 (5.8)        | 24<br>(14.6)   | 2 (9.1)        | 29<br>(14.5)   | 3 (9.1)        | 15<br>(11.0)   | 4 (22.2)       | 10<br>(28.6)  |
| Former smokers, quit ≥ 10 years ago            | 96<br>(28.5)   | 14<br>(26.9)   | 51<br>(30.9)   | 8 (36.4)       | 52<br>(26.0)   | 10<br>(30.3)   | 37<br>(27.2)   | 4 (22.2)       | 6 (17.1)      |
| Has never smoked                               | 121<br>(35.9)  | 25<br>(28.1)   | 61<br>(37.0)   | 7 (31.8)       | 73<br>(36.5)   | 11<br>(33.3)   | 49<br>(36.0)   | 5 (27.8)       | 10<br>(28.6)  |

Supplementary Table 2. List of tagging and the corresponding tagged mtSNPs in the YFS.

| tagging mtSNP | tagged mtSNPs |            |            |            |            |            |
|---------------|---------------|------------|------------|------------|------------|------------|
| m.6045C>T     | m.16051A>G    | m.15907A>G | m.11732T>C | m.508A>G   | m.6152T>C  | m.13020T>C |
|               | m.5390A>G     | m.3720A>G  | m.3116C>T  | m.13734T>C | m.340C>T   | m.11197C>T |
|               | m.10876A>G    |            |            |            |            |            |
| m.6734G>A     | m.250T>C      | m.3990C>T  | m.9053G>A  | m.4529A>T  | m.10034T>C | m.16391G>A |
|               | m.8616G>T     | m.203G>A   | m.3447A>G  | m.9947G>A  |            |            |
| m.15928G>A    | m.11812A>G    | m.14233A>G | m.4917A>G  | m.8697G>A  | m.10463T>C | m.15607A>G |
|               | m.14905G>A    | m.1888G>A  | m.13368G>A |            |            |            |
| m.3505A>G     | m.12414T>C    | m.5460G>A  | m.8994G>A  | m.5046G>A  | m.15884G>C | m.1243T>C  |
|               | m.11674C>T    | m.11947A>G | m.207G>A   |            |            |            |
| m.4024A>G     | m.14365C>T    | m.10044A>G | m.14582A>G | m.8269G>A  | m.5004T>C  | m.9123G>A  |
|               | m.3992C>T     |            |            |            |            |            |
| m.3480A>G     | m.9055G>A     | m.9698T>C  | m.11299T>C | m.16224T>C | m.10550A>G | m.14167C>T |
|               | m.1189T>C     |            |            |            |            |            |
| m.499G>A      | m.4646T>C     | m.5999T>C  | m.11332C>T | m.15693T>C | m.6047A>G  | m.14620C>T |
| m.153A>G      | m.14470T>C    | m.6221T>C  | m.13966A>G | m.16255G>A | m.6371C>T  | m.225G>A   |
| m.12612A>G    | m.489T>C      | m.13708G>A | m.16069C>T | m.295C>T   | m.462C>T   |            |
| m.12618G>A    | m.7768A>G     | m.150C>T   | m.5656A>G  | m.14182T>C |            |            |
| m.4216T>C     | m.16126T>C    | m.15452C>A | m.11251A>G |            |            |            |
| m.4580G>A     | m.16298T>C    | m.72T>C    | m.15904C>T |            |            |            |
| m.13928G>C    | m.13827A>G    | m.16114C>A | m.16526G>A |            |            |            |
| m.10086A>G    | m.12613G>A    | m.9612G>A  | m.4928T>C  |            |            |            |
| m.9477G>A     | m.13617T>C    | m.3197T>C  | m.16270C>T |            |            |            |
| m.11899T>C    | m.3549C>T     | m.7444G>A  | m.16153G>A |            |            |            |
| m.8448T>C     | m.16293A>G    | m.961T>G   | m.13759G>A |            |            |            |
| m.14564A>G    | m.14482C>T    | m.7013G>A  |            |            |            |            |
| m.12192G>A    | m.9039G>A     | m.8843T>C  |            |            |            |            |
| m.13780A>G    | m.10238T>C    | m.12501G>A |            |            |            |            |
| m.186C>A      | m.11191C>T    | m.8715T>C  |            |            |            |            |
| m.10927T>C    | m.16144T>C    | m.7385A>G  |            |            |            |            |
| m.4452T>C     | m.9066A>G     | m.7309T>C  |            |            |            |            |
| m.11467A>G    | m.12372G>A    | m.12308A>G |            |            |            |            |
| m.5263C>T     | m.4639T>C     | m.8869A>G  |            |            |            |            |
| m.9093A>G     | m.9903T>C     | m.11377G>A |            |            |            |            |
| m.11719G>A    | m.14766C>T    |            |            |            |            |            |
| m.5147G>A     | m.930G>A      |            |            |            |            |            |
| m.2706A>G     | m.7028C>T     |            |            |            |            |            |
| m.14793A>G    | m.16256C>T    |            |            |            |            |            |
| m.14872C>T    | m.2259C>T     |            |            |            |            |            |
| m.951G>A      | m.16354C>T    |            |            |            |            |            |
| m.12630G>A    | m.16271T>C    |            |            |            |            |            |
| m.16223C>T    | m.12705C>T    |            |            |            |            |            |
| m.188A>G      | m.185G>A      |            |            |            |            |            |
| m.4059C>T     | m.1341C>T     |            |            |            |            |            |
| m.4769A>G     | m.1438A>G     |            |            |            |            |            |
